# Supplementary material
Source: PubMed Central journal article supplement (PMC10125375)
Supplement: bg1c00069_si_001.pdf [file bg1c00069_si_001.pdf]

## Supporting Information

**Reconsidering the *czcD* (NiCo) riboswitch as an iron riboswitch****Jiansong Xu and Joseph A. Cotruvo, Jr.\***

Department of Chemistry and Center for RNA Molecular Biology, The Pennsylvania State University, University Park, PA 16802 USA

\* Corresponding author. E-mail: juc96@psu.edu (J.A.C.).

This file contains Supplementary Tables S1-S5, Supplementary Figures S1-S7, and Supplementary References.

**SUPPLEMENTARY TABLES****Table S1.** Sequences of the DNA templates used for ITC and sensor studies**Table S2.** Primers used to generate or amplify DNA templates**Table S3.** Calculated  $K_{d,M}$  values used for determination of apparent  $K_{dS}$  of *czcD* sensors**Table S4.** Fluorescence response of **Lmo-2** to first-row transition metal ions**Table S5.** Fluorescence response of **Lmo-3** to first-row transition metal ions**SUPPLEMENTARY FIGURES****Figure S1.** Citrate-buffered fluorescence titrations of **Lmo-2** and **Lmo-3****Figure S2.** Representative thermograms from ITC studies of *Eba* with Ni<sup>II</sup>, Zn<sup>II</sup>, and Mn<sup>II</sup>**Figure S3.** Representative thermogram from ITC studies of the M3 variant of the *Eba* riboswitch**Figure S4.** Simulated ITC thermograms to estimate  $K_d$  for Mn<sup>II</sup> binding to *Eba***Figure S5.** Representative thermograms from ITC studies of *Eba* CG and UA variants with Co<sup>II</sup>**Figure S6.** Citrate-buffered fluorescence titrations of Co<sup>II</sup> and Fe<sup>II</sup> into Sensei sensors**Figure S7.** Representative thermograms from ITC studies of *Lmo* with Ni<sup>II</sup>, Zn<sup>II</sup>, and Mn<sup>II</sup>**SUPPLEMENTARY REFERENCES**

## SUPPLEMENTARY TABLES

**Table S1.** Sequences of the DNA templates used for the riboswitch ITC studies and riboswitch-based sensors. The DNA template sequences for the *Eba*, *Lmo*, and *Cce czd* riboswitches are derived from Furukawa et al.<sup>1</sup> Spinach2 sequences are shown in red.<sup>2</sup> In the sensor constructs, components of the appropriate truncated stem are shown in blue. Mutations present in the *Eba* variants are highlighted. Px-y denotes insertion of Spinach2 into stem x retaining y base pairs. Sensors **Lmo-1**, **Lmo-2**, and **Lmo-3** are the P1-1, P1-2, and P1-3 constructs.

| Name           | Sequence                                                                                                                                                                                                        |
|----------------|-----------------------------------------------------------------------------------------------------------------------------------------------------------------------------------------------------------------|
| <i>Eba</i>     | 5'-<br>ccaagTAATACGACTCACTATAgAACTGAGCAGGCAAATGACCAGAGCGGTCATGCAGCCGGGCTG<br>CGAAAGCGGCAACAGATGATTACACGCACATCTGTGGGACAGTT-3'                                                                                    |
| <i>Eba</i> -CG | 5'-<br>ccaagTAATACGACTCACTATAgAACTGAGCAcGCAAATGACCAGAGCGGTCATGCAGCcGGGGCTG<br>CGAAAGCGGCAACAGATGATTACACGCACATCTGTGGGACAGTT-3'                                                                                   |
| <i>Eba</i> -UA | 5'-<br>ccaagTAATACGACTCACTATAgAACTGAGCAtGCAAATGACCAGAGCGGTCATGCAGCAAGGGGCTG<br>CGAAAGCGGCAACAGATGATTACACGCACATCTGTGGGACAGTT-3'                                                                                  |
| <i>Lmo</i>     | 5'-<br>ccaagTAATACGACTCACTATAgATCTGAACAGGCGGTGAACGTAACACGAGGTTTCATGCAGCTGG<br>GCTGCAATTATTTGCGGCAGCAGACTATGTATTCTAAGGGCATATCTGTGGGACAGTT-3'                                                                     |
| <i>Cce</i>     | 5'-<br>ccaagTAATACGACTCACTATAgAACTGAGCAGGCGATGGACCTTTCATAGAGGTACATGGGGCCG<br>GGCCACCCAGTGAGTGGCAGCAGATTGCAATCATGCACATCTGTGGGACAGTA-3'                                                                           |
| Sensei         | 5'-<br>ccaagTAATACGACTCACTATAGGTGGACGAAGTCGGCAGAGGTCCATTAGTCGGGGCCGTAGTC<br>ACGGCAGCGGTTATTTTAGATCCACAACAGCCTATCCC-3'                                                                                           |
| Spinach2       | 5'-<br>GATGTAAGTGAATGAAATGGTGAAGGACGGGTCCAGTAGGCTGCTTCGGCAGCCTACTTGTGTA<br>GTAGAGTGTGAGCTCCGTAAGTACATC-3'                                                                                                       |
| <i>Lmo</i> -1  | 5'-<br>ccaagTAATACGACTCACTATAgGATGTAAGTGAATGAAATGGTGAAGGACGGGTCCAgaacaggcggtg<br>aacgtaacacgaggttcatgcagctgggctgcaattatttgcggcagcagactatgtattctaagggcatatctgtgggaTTGTTGAGTA<br>GAGTGTGAGCTCCGTAAGTACATC-3'      |
| <i>Lmo</i> -2  | 5'-<br>ccaagTAATACGACTCACTATAgGATGTAAGTGAATGAAATGGTGAAGGACGGGTCCAtgaacaggcggt<br>gaacgtaacacgaggttcatgcagctgggctgcaattatttgcggcagcagactatgtattctaagggcatatctgtgggaTTGTTGAG<br>TAGAGTGTGAGCTCCGTAAGTACATC-3'     |
| <i>Lmo</i> -3  | 5'-<br>ccaagTAATACGACTCACTATAgGATGTAAGTGAATGAAATGGTGAAGGACGGGTCCActgaacaggcgg<br>tgaacgtaacacgaggttcatgcagctgggctgcaattatttgcggcagcagactatgtattctaagggcatatctgtgggacagTTGTTGA<br>GTAGAGTGTGAGCTCCGTAAGTACATC-3' |
| Sensei<br>P1-2 | 5'-<br>ccaagTAATACGACTCACTATAgATGTAAGTGAATGAAATGGTGAAGGACGGGTCCAGGACGAAGT<br>CGGCAGAGGTCCATTAGTCGGGGCCGTAGTCACGGCAGCGGTTATTTTAGATCCACAACAGCCT<br>TTGTTGAGTAGAGTGTGAGCTCCGTAAGTACATC-3'                          |
| Sensei<br>P1-3 | 5'-<br>ccaagTAATACGACTCACTATAgATGTAAGTGAATGAAATGGTGAAGGACGGGTCCAtGGACGAAGT<br>CGGCAGAGGTCCATTAGTCGGGGCCGTAGTCACGGCAGCGGTTATTTTAGATCCACAACAGCCT<br>ATTGTTGAGTAGAGTGTGAGCTCCGTAAGTACATC-3'                        |
| Sensei<br>P1-4 | 5'-<br>ccaagTAATACGACTCACTATAgATGTAAGTGAATGAAATGGTGAAGGACGGGTCCAgTGGACGAAG<br>TCGGCAGAGGTCCATTAGTCGGGGCCGTAGTCACGGCAGCGGTTATTTTAGATCCACAACAGCC<br>TATTGTTGAGTAGAGTGTGAGCTCCGTAAGTACATC-3'                       |

**Table S2.** Primers used to generate or amplify DNA templates

| <b>Name</b>    | <b>Sequence</b>                                                                                |
|----------------|------------------------------------------------------------------------------------------------|
| Eba-top        | 5'-<br>CCAAGTAATACGACTCACTATAGAACTGAGCAGGCAAATGACCAGAGCGGTCATGCAGC<br>CGGGCTGCGAAA-3'          |
| Eba-bottom     | 5'-<br>AACTGTCCCACAGATGTGCGTGTAAATCATCTGTTGCCGCTTTCGCAGCCCCGGCTGCATGA<br>C-3'                  |
| Eba-CG-top     | 5'-<br>ccaagTAATACGACTCACTATAgAACTGAGCAGCAAATGACCAGAGCGGTCATGCAGCGG<br>GGCTGCGAAA-3'           |
| Eba-CG-bottom  | 5'-<br>AACTGTCCCACAGATGTGCGTGTAAATCATCTGTTGCCGCTTTCGCAGCCCCGGCTGCATGA<br>C-3'                  |
| Eba-UA-top     | 5'-<br>ccaagTAATACGACTCACTATAgAACTGAGCATGCAAATGACCAGAGCGGTCATGCAGCAG<br>GGCTGCGAAA-3'          |
| Eba-UA-bottom  | 5'-<br>AACTGTCCCACAGATGTGCGTGTAAATCATCTGTTGCCGCTTTCGCAGCCCTGCTGCATGA<br>C-3'                   |
| Lmo-top        | 5'-<br>CCAAGTAATACGACTCACTATAGATCTGAACAGGCGGTGAACGTAACACGAGGTTTCATGC<br>AGCTGGGCTGCAATT-3'     |
| Lmo-bottom     | 5'-<br>AACTGTCCCACAGATATGCCCTTAGAATACATAGTCTGCTGCCGCAAATAATTGCAGCCC<br>AGCTGC-3'               |
| Cce-top        | 5'-<br>CCAAGTAATACGACTCACTATAGAACTGAGCAGGCGATGGACCTTTCATAGAGGTACATG<br>GGCCGGGCCACCCAGTGAGT-3' |
| Cce-bottom     | 5'- TACTGTCCCACAGATGTGCATGATTGCAATCTGCTGCCACTCACTGGGTGGCCC -3'                                 |
| Sensei-top     | 5'-<br>CCAAGTAATACGACTCACTATAGGTGGACGAAGTCGGCAGAGGTCCATTAGTCGGGGCC<br>GTAGTCA-3'               |
| Sensei-bottom  | 5'-<br>GGGATAGGCTGTTGTGGATCTAAAATAACCGCTGCCGTGACTACGGCCCCGACTAATGG<br>A-3'                     |
| Lmo_P1-3_fwd   | 5'-GATGTAAGTGAATGAAATGGTGAAGGACGGGTCCACTGAACAGGCGGTGAACG-3'                                    |
| Lmo_P1-3_rev   | 5'-<br>GATGTAAGTGAATGAAATGGTGAAGGACGGGTCCACTGAACAGGCGGTGAACG-3'                                |
| Lmo_P1-2_fwd   | 5'-GATGTAAGTGAATGAAATGGTGAAGGACGGGTCCACTGAACAGGCGGTGAACG-3'                                    |
| Lmo_P1-2_rev   | 5'-<br>GATGTAAGTGAATGAAATGGTGAAGGACGGGTCCACTGAACAGGCGGTGAACG-3'                                |
| Lmo_P1-1_fwd   | 5'-GATGTAAGTGAATGAAATGGTGAAGGACGGGTCCACTGAACAGGCGGTGAACG-3'                                    |
| Lmo_P1-1_rev   | 5'-<br>GATGTAAGTGAATGAAATGGTGAAGGACGGGTCCACTGAACAGGCGGTGAACG-3'                                |
| T7_Sp2_Amp_fwd | 5'-CCAAGTAATACGACTCACTATAGGATGTAAGT-3'                                                         |
| Sp2_Amp_rev    | 5'-GATGTAAGTGAATGAAATGGTGAAGGACGGGTCCACTGAACAGGCGGTGAACG-3'                                    |

**Table S3.** Calculated  $K_{d,M}$  values (effective  $K_d$  values for metal-citrate buffers) used for determination of apparent  $K_{d,s}$  of *czcD* sensors. For full details, see the Supporting Information of Xu and Cotruvo.<sup>3</sup>

| Chelator    | Metal            | log $K_M$ | Adjusted $K_{d,M}$    |
|-------------|------------------|-----------|-----------------------|
| Citric acid | Mn <sup>II</sup> | 4.15      | $7.30 \times 10^{-5}$ |
|             | Fe <sup>II</sup> | 4.40      | $4.10 \times 10^{-5}$ |
|             | Co <sup>II</sup> | 5.00      | $1.05 \times 10^{-5}$ |
|             | Ni <sup>II</sup> | 5.40      | $4.10 \times 10^{-6}$ |
|             | Zn <sup>II</sup> | 4.98      | $1.08 \times 10^{-6}$ |
|             | Mg <sup>II</sup> | 3.37      | $4.60 \times 10^{-4}$ |

**Table S4.** Fluorescence response of **Lmo-2** to first-row transition metal ions (see **Figure S1A**)

|                          | Mn <sup>II</sup> | Fe <sup>II</sup> | Co <sup>II</sup> | Ni <sup>II</sup> | Zn <sup>II</sup> |
|--------------------------|------------------|------------------|------------------|------------------|------------------|
| $K_{d,app}$ (nM)         | $5900 \pm 200$   | $270 \pm 10$     | $64 \pm 2$       | $52 \pm 3$       | $1969 \pm 60$    |
| $F_{max}/F_{min}$        | 3.9              | 4.1              | 5.1              | 4.0              | 4.6              |
| Hill coefficient ( $n$ ) | $2.1 \pm 0.1$    | $2.9 \pm 0.4$    | $1.9 \pm 0.1$    | $1.5 \pm 0.1$    | $2.2 \pm 0.1$    |

Conditions: 30 mM MOPS, 100 mM KCl, 3 mM MgCl<sub>2</sub>, 1 mM citrate pH 7.2, 20 °C; 100 nM **Lmo-3**, 10 μM DFHBI-1T

**Table S5.** Fluorescence response of **Lmo-3** to first-row transition metal ions (see **Figure S1B**)

|                          | Mn <sup>II</sup>  | Fe <sup>II</sup> | Co <sup>II</sup> | Ni <sup>II</sup> | Zn <sup>II</sup> |
|--------------------------|-------------------|------------------|------------------|------------------|------------------|
| $K_{d,app}$ (nM)         | N.R. <sup>a</sup> | $2700 \pm 200$   | $820 \pm 100$    | $290 \pm 30$     | N.R.             |
| $F_{max}/F_{min}$        | N.D. <sup>b</sup> | 12.8             | 15.2             | 13.6             | N.D.             |
| Hill coefficient ( $n$ ) | N.D.              | $2.5 \pm 0.2$    | $2.8 \pm 0.5$    | $2.2 \pm 0.3$    | N.D.             |

<sup>a</sup> N.R.: No response detected. <sup>b</sup> N.D.: Not determined. Conditions: 30 mM MOPS, 100 mM KCl, 3 mM MgCl<sub>2</sub>, 1 mM citrate pH 7.2, 20 °C; 100 nM **Lmo-3**, 10 μM DFHBI-1T

## SUPPLEMENTARY FIGURES

**Figure S1.** Citrate-buffered fluorescence titrations of (A) **Lmo-2** and (B) **Lmo-3** with  $\text{Mn}^{\text{II}}$ ,  $\text{Fe}^{\text{II}}$ ,  $\text{Co}^{\text{II}}$ ,  $\text{Ni}^{\text{II}}$ , and  $\text{Zn}^{\text{II}}$ . For each construct, fluorescence response was evaluated by titrating metal into 100 nM sensor and 10  $\mu\text{M}$  DFHBI-1T, in 30 mM MOPS, 100 mM KCl, 3 mM  $\text{MgCl}_2$ , and 1 mM citrate, pH 7.2, at 20 °C. (C) Representation of the sensor constructs, illustrating the junction between the P1 stem and Spinach2, with **Lmo-1** and **Lmo-2** given as examples.

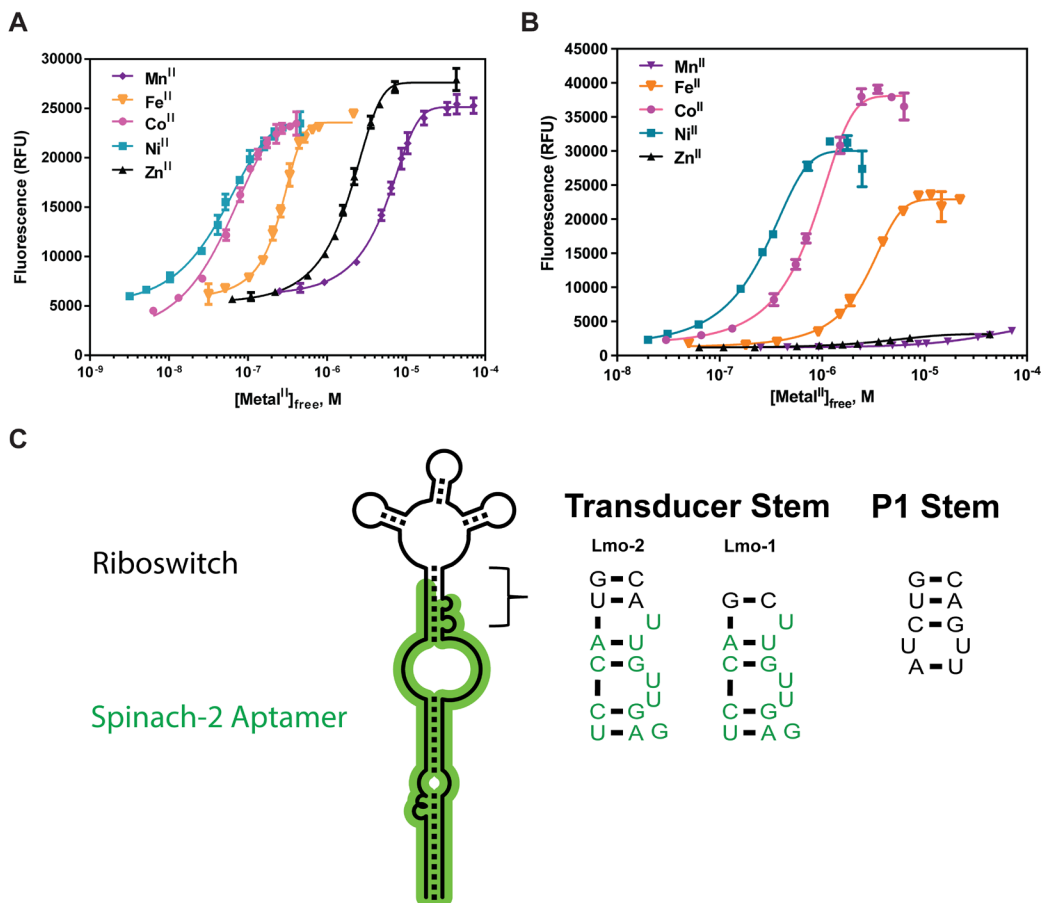

**Figure S2.** Representative thermograms from ITC studies of the *Eba* riboswitch (9.4-11  $\mu$ M RNA) with  $\text{Ni}^{\text{II}}$ ,  $\text{Zn}^{\text{II}}$ , and  $\text{Mn}^{\text{II}}$ . The data are fitted to a model with one set of equivalent binding sites. Experimental conditions and fitted parameters are provided in **Table 2**.

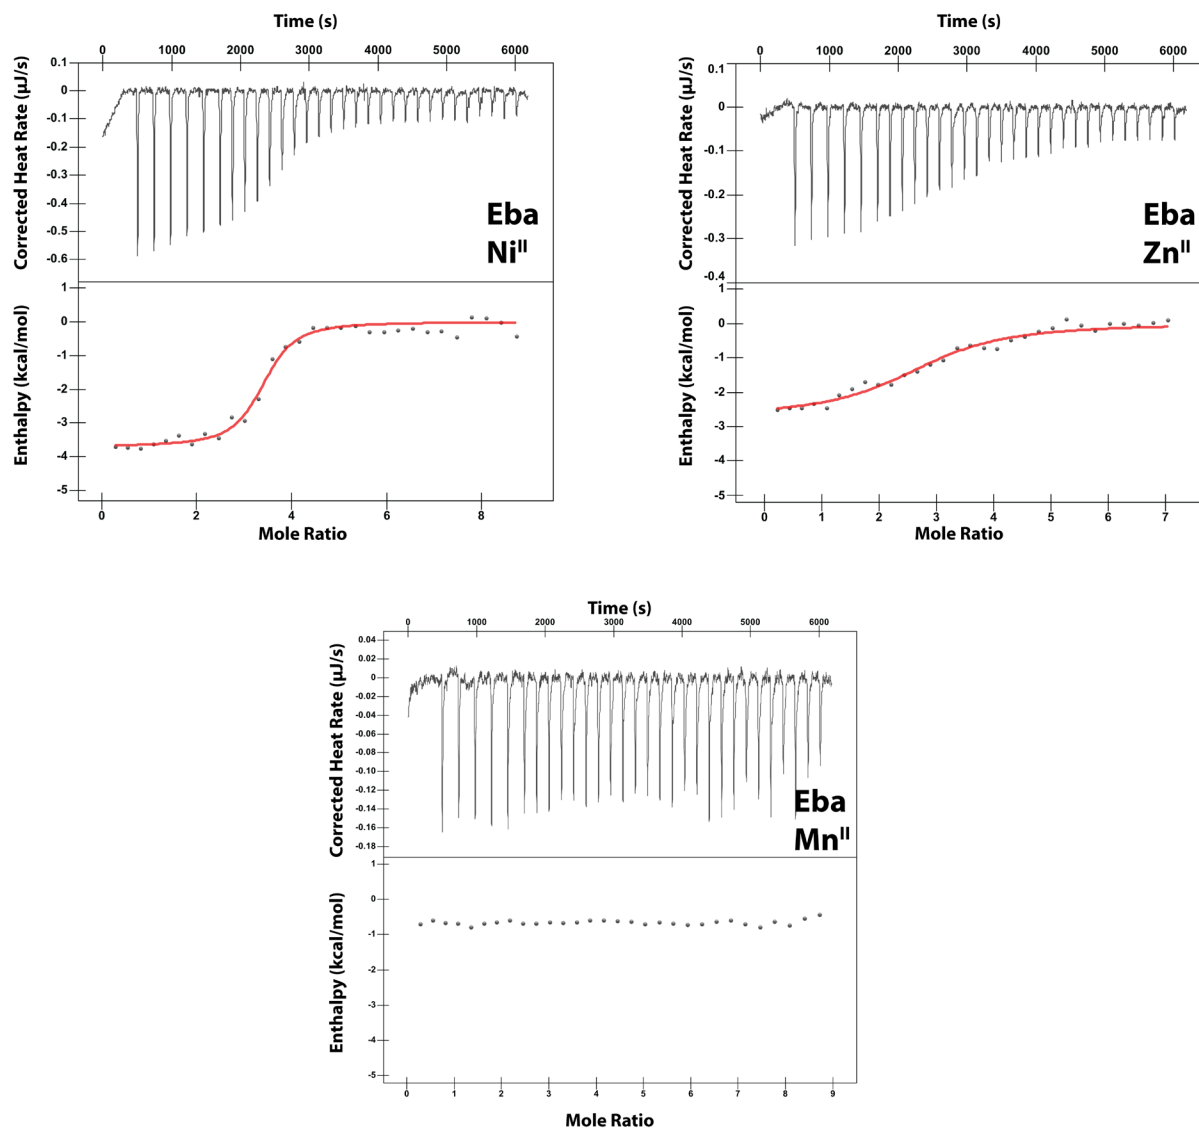

**Figure S3.** Representative thermogram from ITC studies of the M3 variant of the *Eba* riboswitch (8  $\mu\text{M}$  RNA) with  $\text{Co}^{\text{II}}$ . The data are fitted to a model with one set of equivalent binding sites. Conditions: 30 mM MOPS, 100 mM KCl, 3 mM  $\text{MgCl}_2$ , pH 7.2, 20  $^{\circ}\text{C}$ .

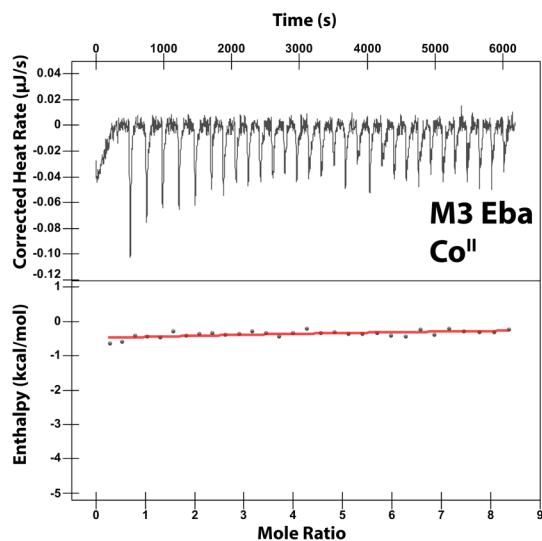

**Figure S4.** Simulated ITC thermograms for metal ion binding to the *Eba* riboswitch, to estimate  $K_{\text{d,app}}$  for  $\text{Mn}^{\text{II}}\text{-Eba}$ . Simulation parameters are based on the experimental parameters for other metal ions (10  $\mu\text{M}$  RNA in cell, 600  $\mu\text{M}$  metal ion in syringe,  $30 \times 1.2 \mu\text{L}$  injections, 20  $^{\circ}\text{C}$ ) and  $n = 3$  and  $\Delta H = -4.5 \text{ kcal/mol}$ . Comparing to the experimental data in **Figure S2**, we suggest a  $K_{\text{d,app}}$  between 0.1 and 1 mM.

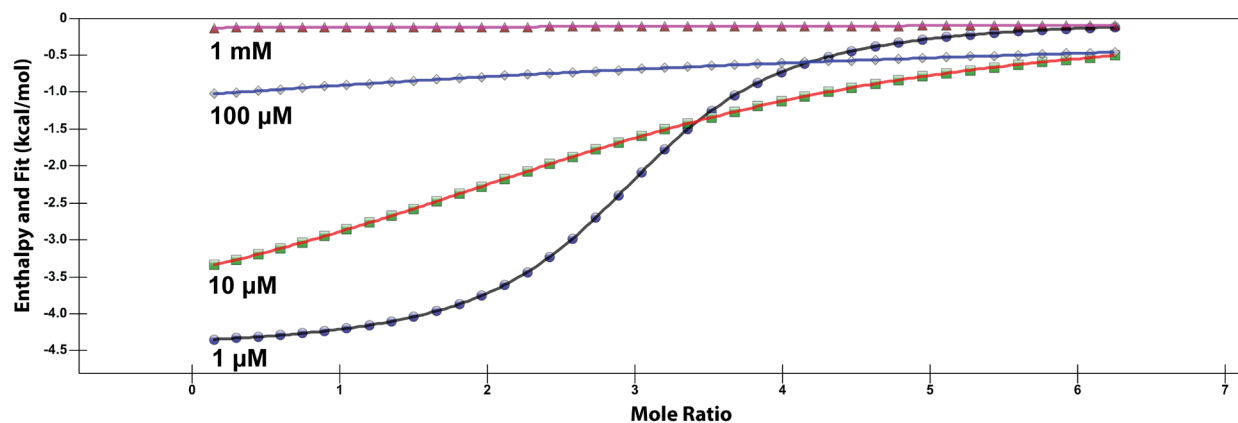

**Figure S5.** Representative thermograms from ITC studies of the CG and UA variants of the *Eba* riboswitch (8.5-11  $\mu\text{M}$ ) with  $\text{Co}^{\text{II}}$ . The data are fitted to a model with one set of equivalent binding sites. Experimental conditions and fitted parameters are provided in **Table 2**.

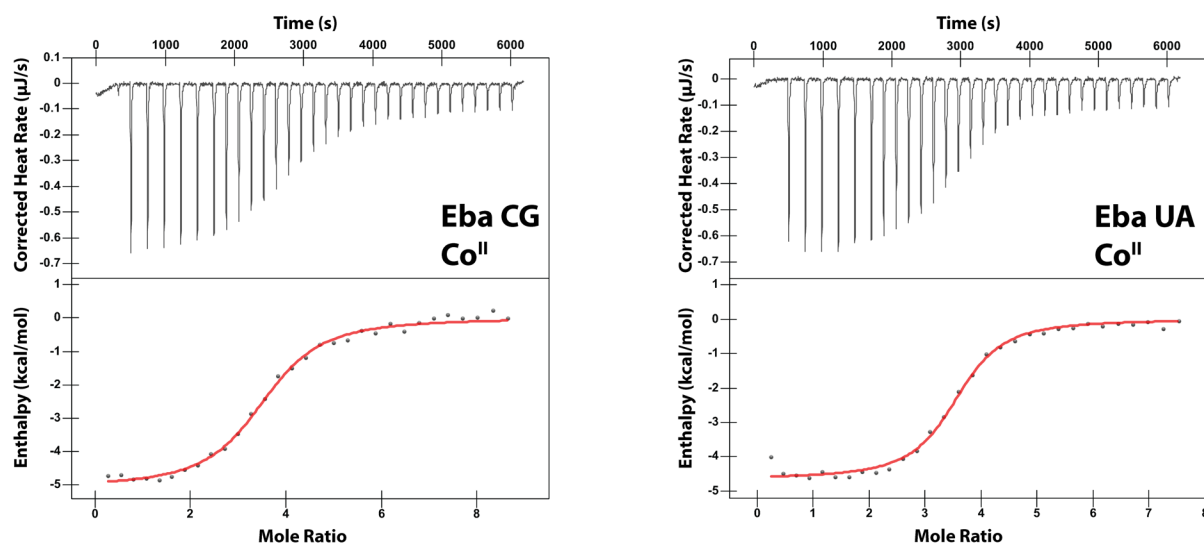

**Figure S6.** Citrate-buffered fluorescence titrations of (A)  $\text{Co}^{\text{II}}$  and (B)  $\text{Fe}^{\text{II}}$  into Sensei sensors. For each construct, fluorescence response was evaluated by titrating metal into 100 nM sensor and 10  $\mu\text{M}$  DFHBI-1T, in 30 mM MOPS, 100 mM KCl, 3 mM  $\text{MgCl}_2$ , and 1 mM citrate, pH 7.2, at 20  $^{\circ}\text{C}$ . The sensors did not show any fluorescence activation with the metals.

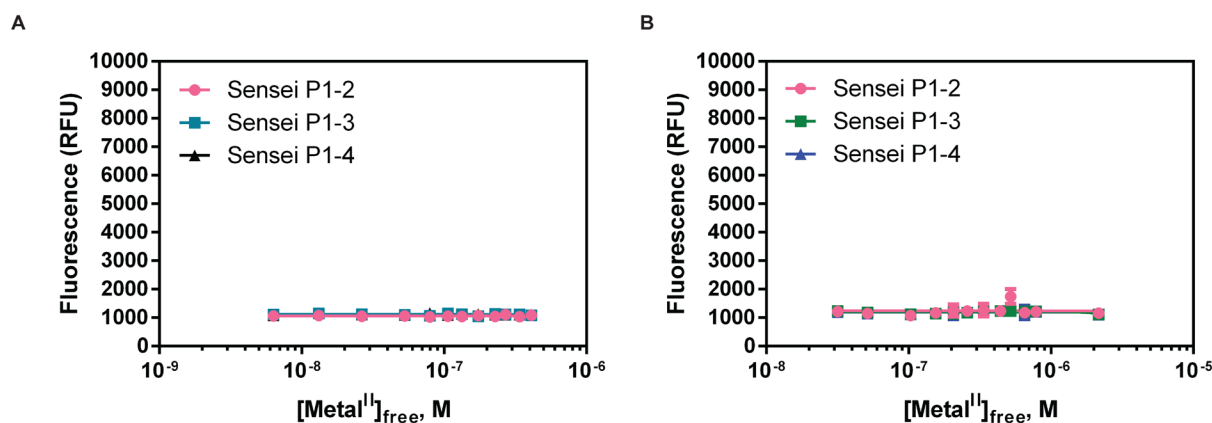



**Figure S7.** Representative thermograms from ITC studies of the *Lmo* riboswitch (8-10  $\mu$ M RNA) with  $\text{Ni}^{\text{II}}$ ,  $\text{Zn}^{\text{II}}$ , and  $\text{Mn}^{\text{II}}$ . The data are fitted to a model with one set of equivalent binding sites. Experimental conditions and fitted parameters are provided in **Table 2**.

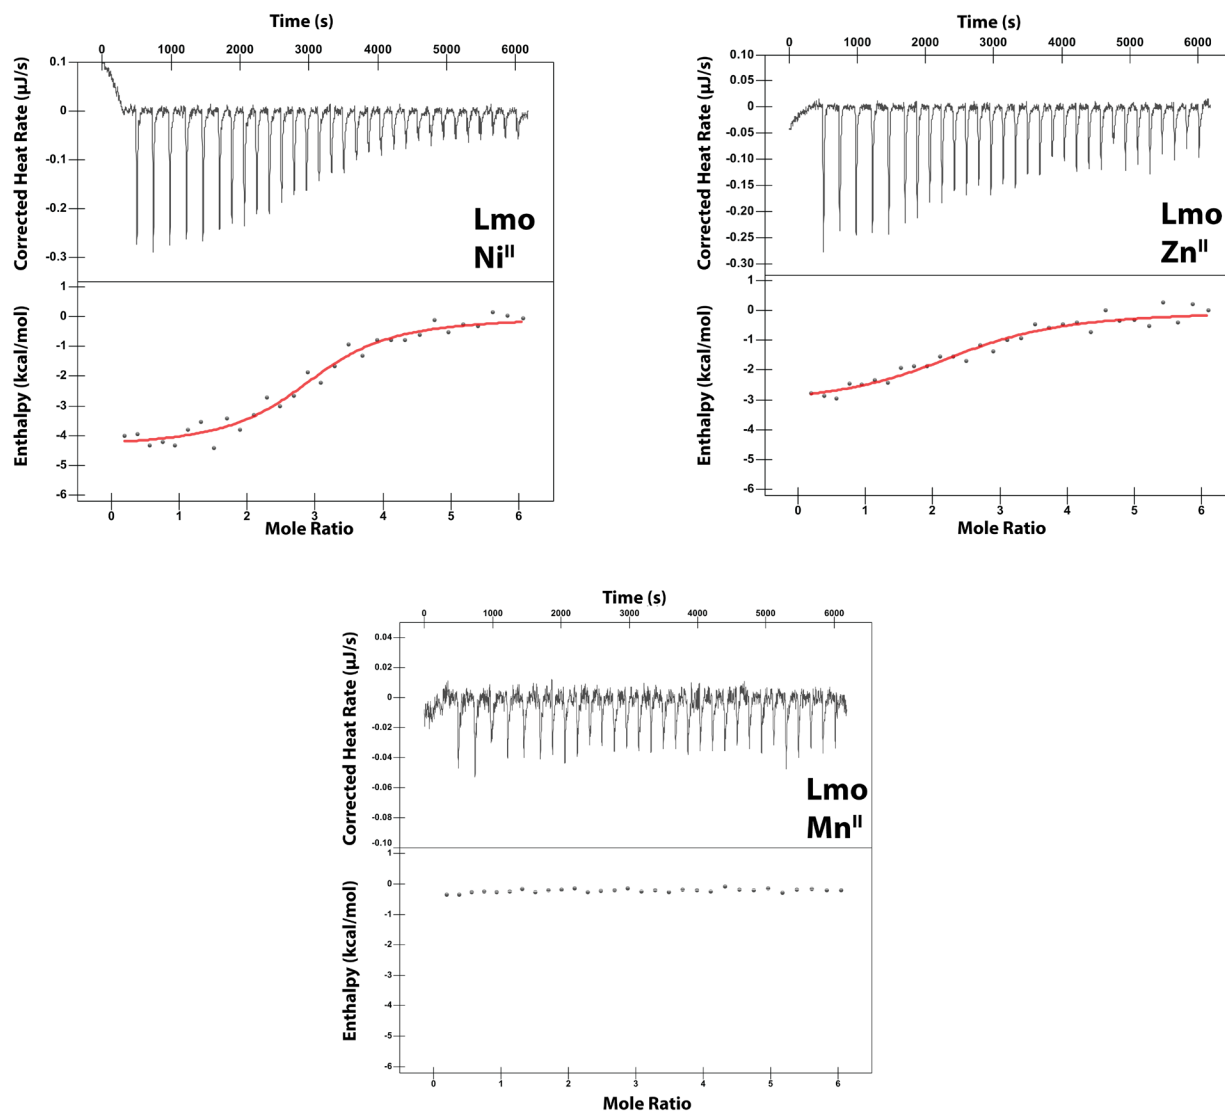

**REFERENCES**

1. Furukawa, K.; Ramesh, A.; Zhou, Z.; Weinberg, Z.; Vallery, T.; Winkler, W. C.; Breaker, R. R., Bacterial riboswitches cooperatively bind Ni<sup>2+</sup> or Co<sup>2+</sup> ions and control expression of heavy metal transporters. *Mol. Cell* **2015**, *57*, 1088-1098.
2. Strack, R. L.; Disney, M. D.; Jaffrey, S. R., A superfolding Spinach2 reveals the dynamic nature of trinucleotide repeat-containing RNA. *Nat. Methods* **2013**, *10*, 1219-1224.
3. Xu, J.; Cotruvo, J. A. J., The *czcD* (NiCo) riboswitch responds to iron(II). *Biochemistry* **2020**, *59*, 1508-1516.
